# Supplementary material
Source: publisher figshare collection journal article supplement (https://acs.figshare.com/ndownloader/files/9458869)
Supplement: Supplementary file 1 [file 9458869]

Supporting Information for:

**Facile gel-based morphological control of Ag/g-C<sub>3</sub>N<sub>4</sub> porous nanofibers for photocatalytic hydrogen generation**

Jiangpeng Wang,<sup>a‡</sup> Jingkun Cong,<sup>a‡</sup> Hui Xu,<sup>b\*</sup> Jinming Wang,<sup>a</sup> Hong Liu,<sup>a</sup> Mei

Liang,<sup>a</sup> Junkuo Gao,<sup>a,c\*</sup>, Qingqin Ni,<sup>d</sup> Juming Yao,<sup>a</sup>

<sup>a</sup>The Key laboratory of Advanced Textile Materials and Manufacturing Technology of Ministry of Education, National Engineering Lab for Textile Fiber Materials and Processing Technology (Zhejiang), College of Materials and Textiles, Zhejiang Sci-Tech University, Hangzhou 310018, P. R. China.

<sup>b</sup>Institute of Coordination Bond Metrology and Engineering, College of Materials Science and Engineering, China Jiliang University, Hangzhou 310018, China.

<sup>c</sup>State Key Laboratory of Silicon Materials, College of Materials Science and Engineering, Zhejiang University, Hangzhou 310027, China

<sup>d</sup>Department of Mechanical Engineering & Robotics, Shinshu University, 3-15-1 Tokida, Ueda, Nagano 386-8576, Japan

**Number of Pages: 3**

**Number of Figures: 8**

**Number of Tables: 0**

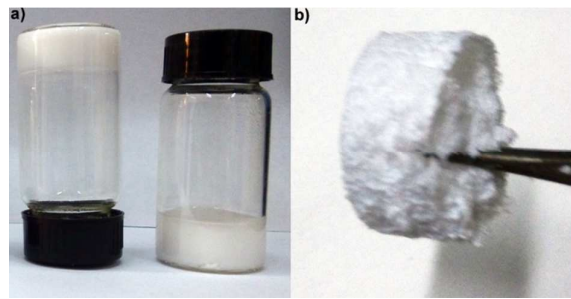

Figure S1. Photograph of AgMA2 hydrogel and freeze-dried sample.

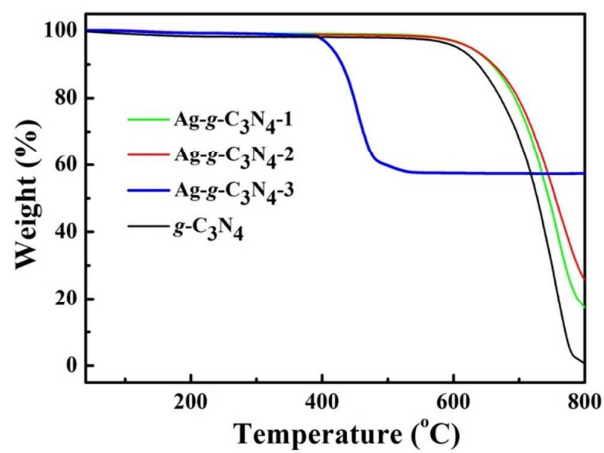

Figure S2. The TG curves of Ag-g-C<sub>3</sub>N<sub>4</sub>-1, Ag-g-C<sub>3</sub>N<sub>4</sub>-2, Ag-g-C<sub>3</sub>N<sub>4</sub>-3 and g-C<sub>3</sub>N<sub>4</sub>.

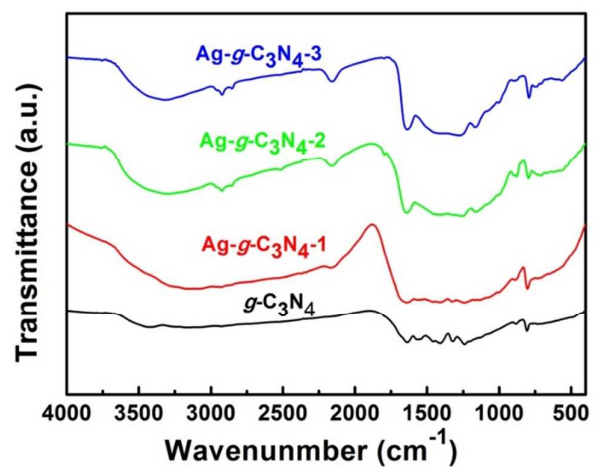

Figure S3. IR spectra of Ag-g-C<sub>3</sub>N<sub>4</sub>-1, Ag-g-C<sub>3</sub>N<sub>4</sub>-2, Ag-g-C<sub>3</sub>N<sub>4</sub>-3 and g-C<sub>3</sub>N<sub>4</sub>.

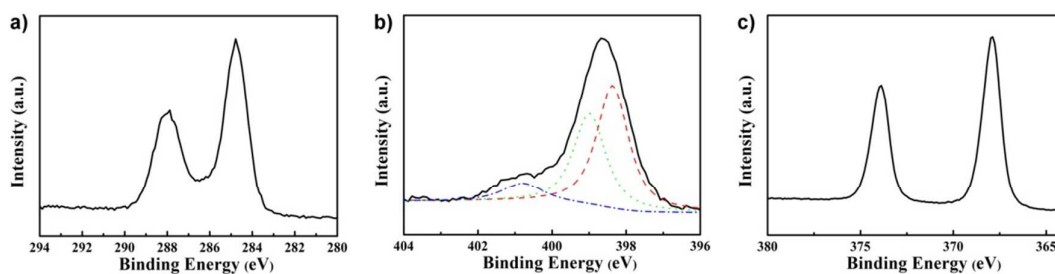

**Figure S4.** XPS spectra of the synthesized **Ag-g-C<sub>3</sub>N<sub>4</sub>-3**. (a) C 1s spectra of **Ag-g-C<sub>3</sub>N<sub>4</sub>-3**. (b) N 1s spectra of **Ag-g-C<sub>3</sub>N<sub>4</sub>-3**. (c) Ag 3d spectra of **Ag-g-C<sub>3</sub>N<sub>4</sub>-3**.

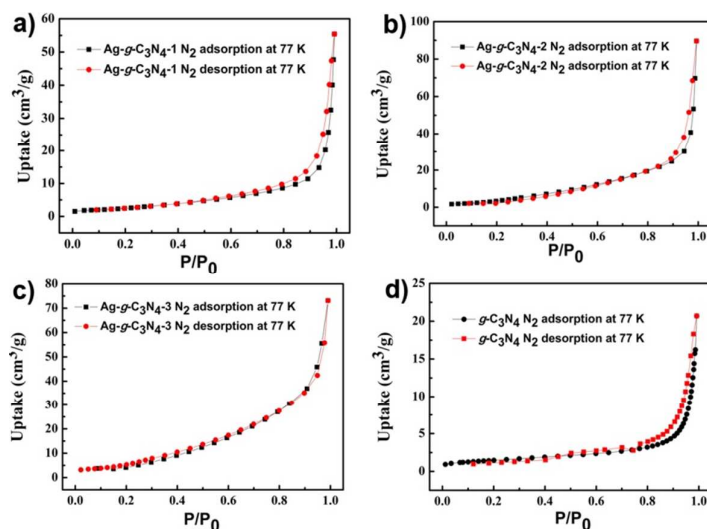

**Figure S5.** Nitrogen sorption isotherm of (a) **Ag-g-C<sub>3</sub>N<sub>4</sub>-1**; (b) **Ag-g-C<sub>3</sub>N<sub>4</sub>-2**; (c) **Ag-g-C<sub>3</sub>N<sub>4</sub>-3**; (d) **g-C<sub>3</sub>N<sub>4</sub>**.

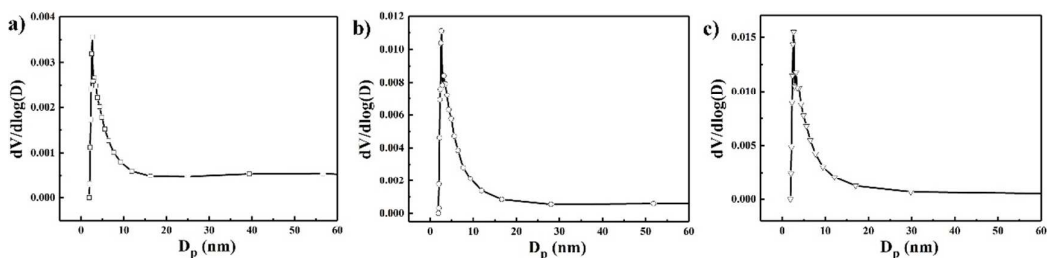

**Figure S6.** The BJH pore-size distribution curves (a) **Ag-g-C<sub>3</sub>N<sub>4</sub>-1**; (b) **Ag-g-C<sub>3</sub>N<sub>4</sub>-2**; (c) **Ag-g-C<sub>3</sub>N<sub>4</sub>-3**.

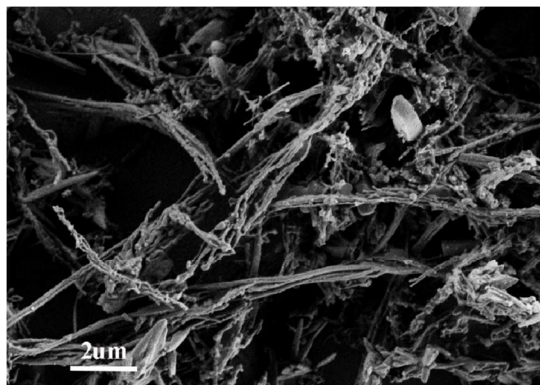

**Figure S7.** SEM image of used Ag-g-C<sub>3</sub>N<sub>4</sub>-2 after photocatalysis.

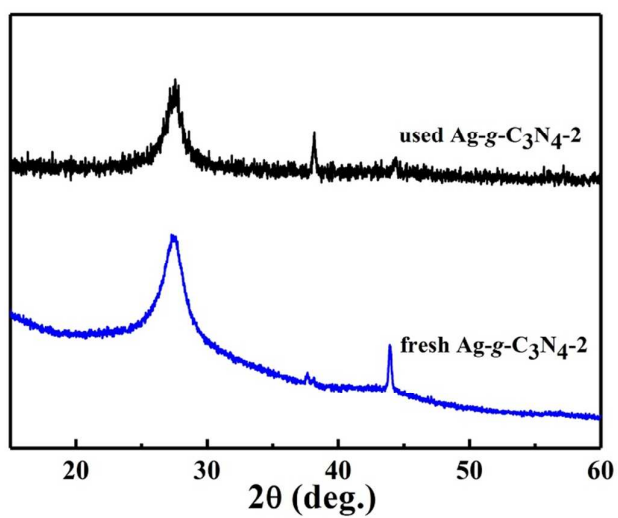

**Figure S8.** XRD pattern of fresh Ag-g-C<sub>3</sub>N<sub>4</sub>-2 and used Ag-g-C<sub>3</sub>N<sub>4</sub>-2 after photocatalysis.
